# Supplementary material for: Improving energy relay dyes for dye-sensitized solar cells by use of a group of uniform materials based on organic salts (GUMBOS)
Source: Royal Society of Chemistry journal article supplement (doi:10.1039/c6ra21980b), 2016-01-01
Supplement: c6ra21980b1.pdf [file c6ra21980b1.pdf]

Supporting Information

**Improving Energy Relay Dyes for Dye-Sensitized Solar Cells by Use of a Group of Uniform  
Materials Based on Organic Salts (GUMBOS)**

Paulina E. Kolic,<sup>a</sup> Noureen Siraj,<sup>b</sup> Mingyan Cong,<sup>a</sup> Bishnu P. Regmi,<sup>a</sup> Xinning Luan,<sup>c</sup> Ying  
Wang,<sup>c</sup> and Isiah M. Warner<sup>\*,a</sup>

<sup>a</sup>Department of Chemistry, Louisiana State University, Baton Rouge, LA 70803, USA.

<sup>b</sup> Department of Chemistry, University of Arkansas at Little Rock, Little Rock, AR 72204, USA.

<sup>c</sup>Department of Mechanical Engineering, Louisiana State University, Baton Rouge, LA 70803,  
USA.

\*Corresponding Author:

Email address: [iwarner@lsu.edu](mailto:iwarner@lsu.edu), Phone (225)578-2829

Postal Address: 432 Choppin Hall, Department of Chemistry, Louisiana State University, Baton Rouge, LA 70810

Table S1. Melting point of GUMBOS.

| GUMBOS                       | Melting Point (°C) |
|------------------------------|--------------------|
| [RhB][NTf <sub>2</sub> ]     | 91                 |
| [RhB][BETI]                  | 88                 |
| [TC1][NTf <sub>2</sub> ]     | 235                |
| [TC1][BETI]                  | 215                |
| [TC1][TPB]                   | 231                |
| [PC][NTf <sub>2</sub> ]      | 248                |
| [PC][BETI]                   | 247                |
| [P66614] <sub>4</sub> [TCPP] | 128                |

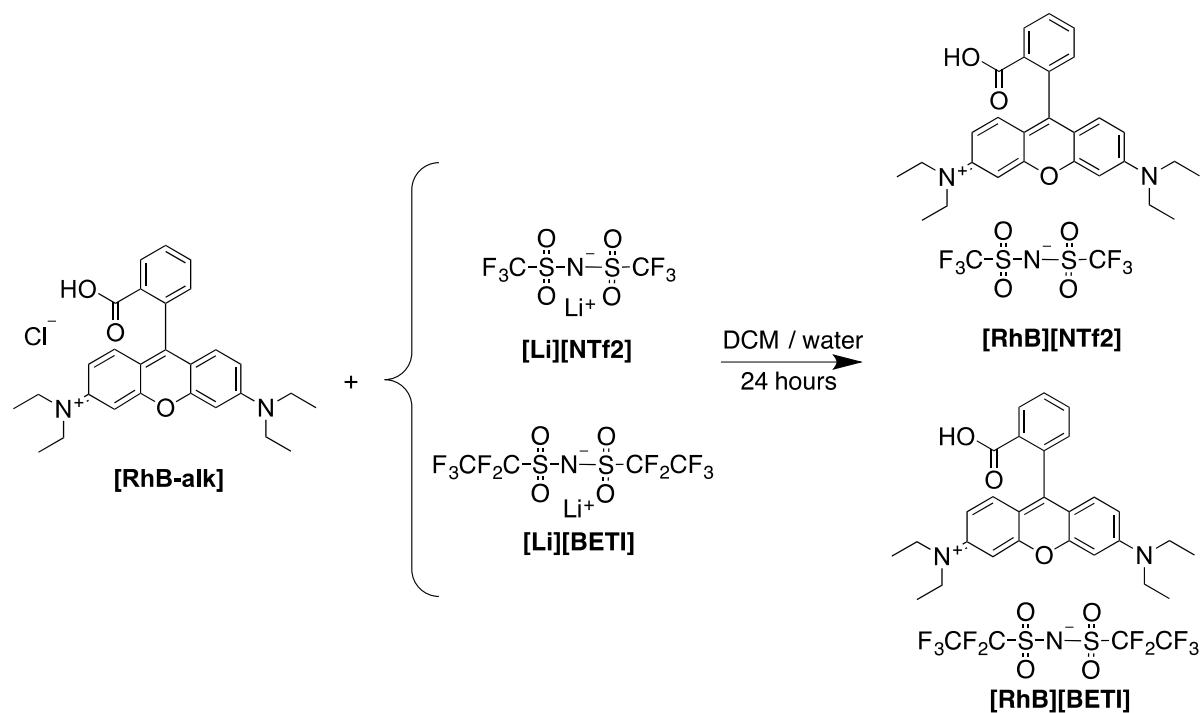

Figure S1. Formation of Rhodamine B (RhB)-based GUMBOS.

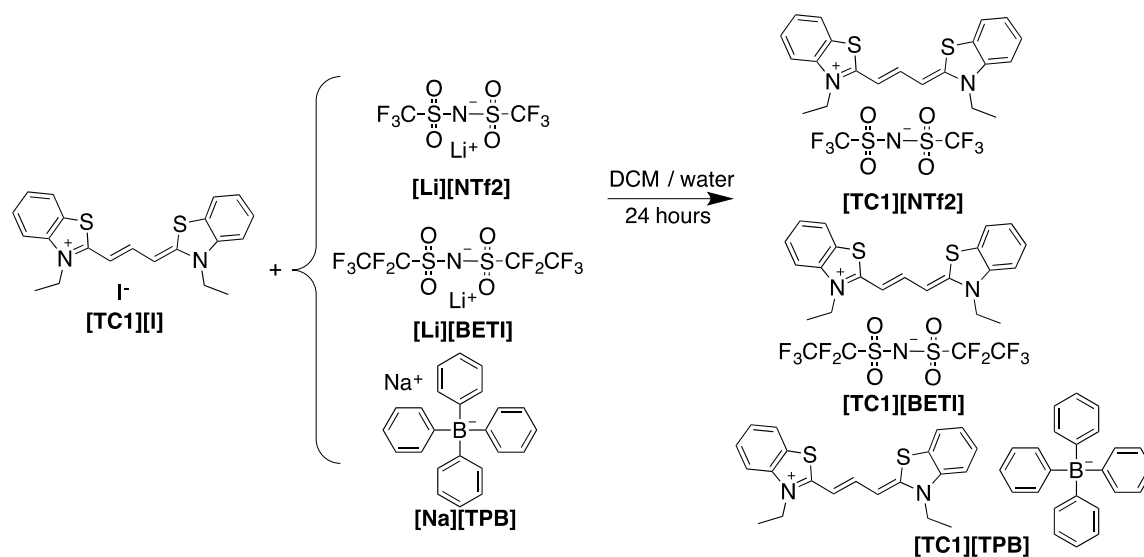

Figure S2. Formation of 3,3'-diethylthiacarbocyanine (TC1)-based GUMBOS.

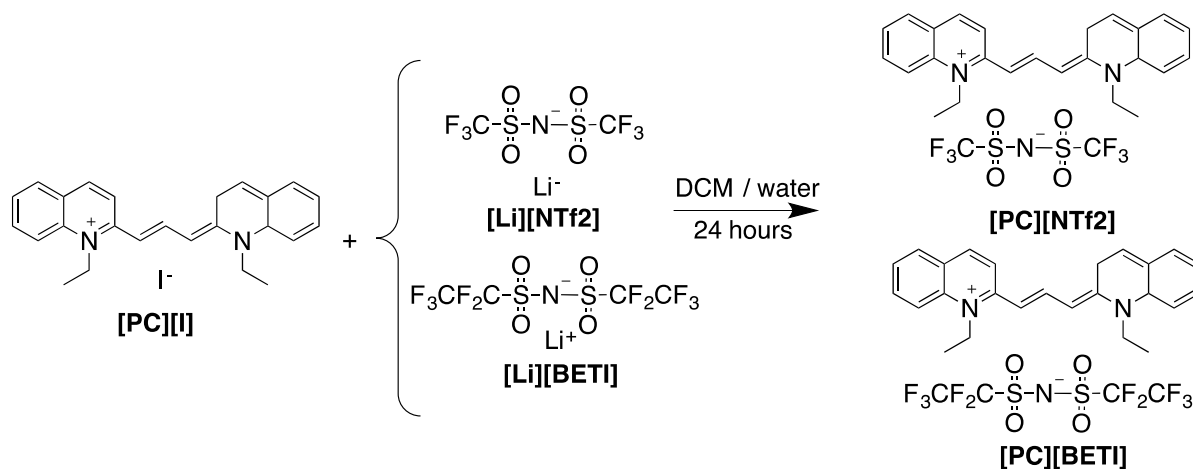

Figure S3. Formation of 1,1'-diethyl-2,2'-carbocyanine iodide (PC)-based GUMBOS.

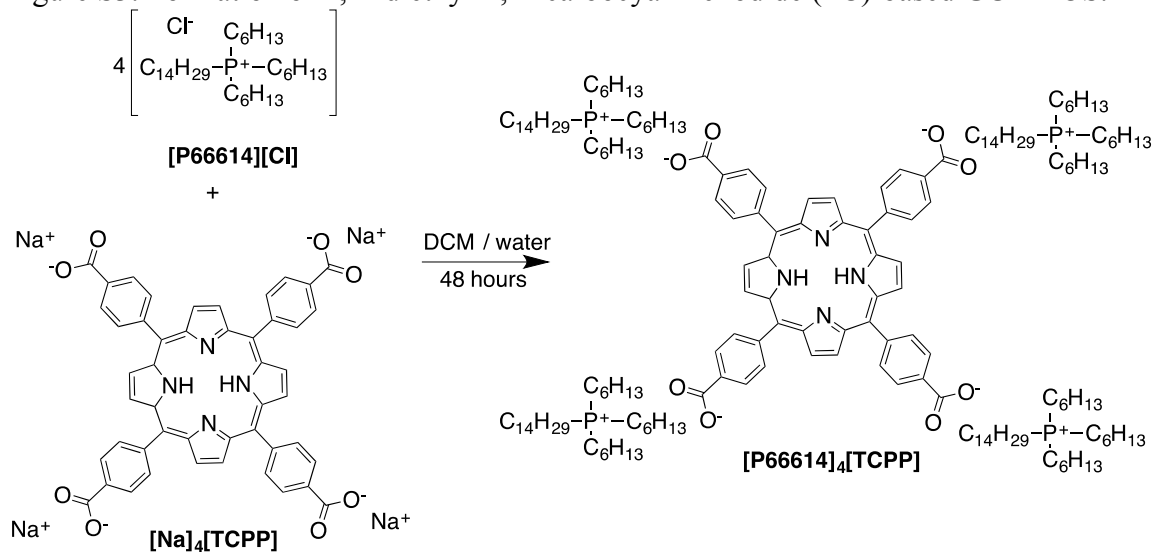

Figure S4. Formation of meso-tetra(4-carboxyphenyl) porphine (TCPP)-based GUMBOS.

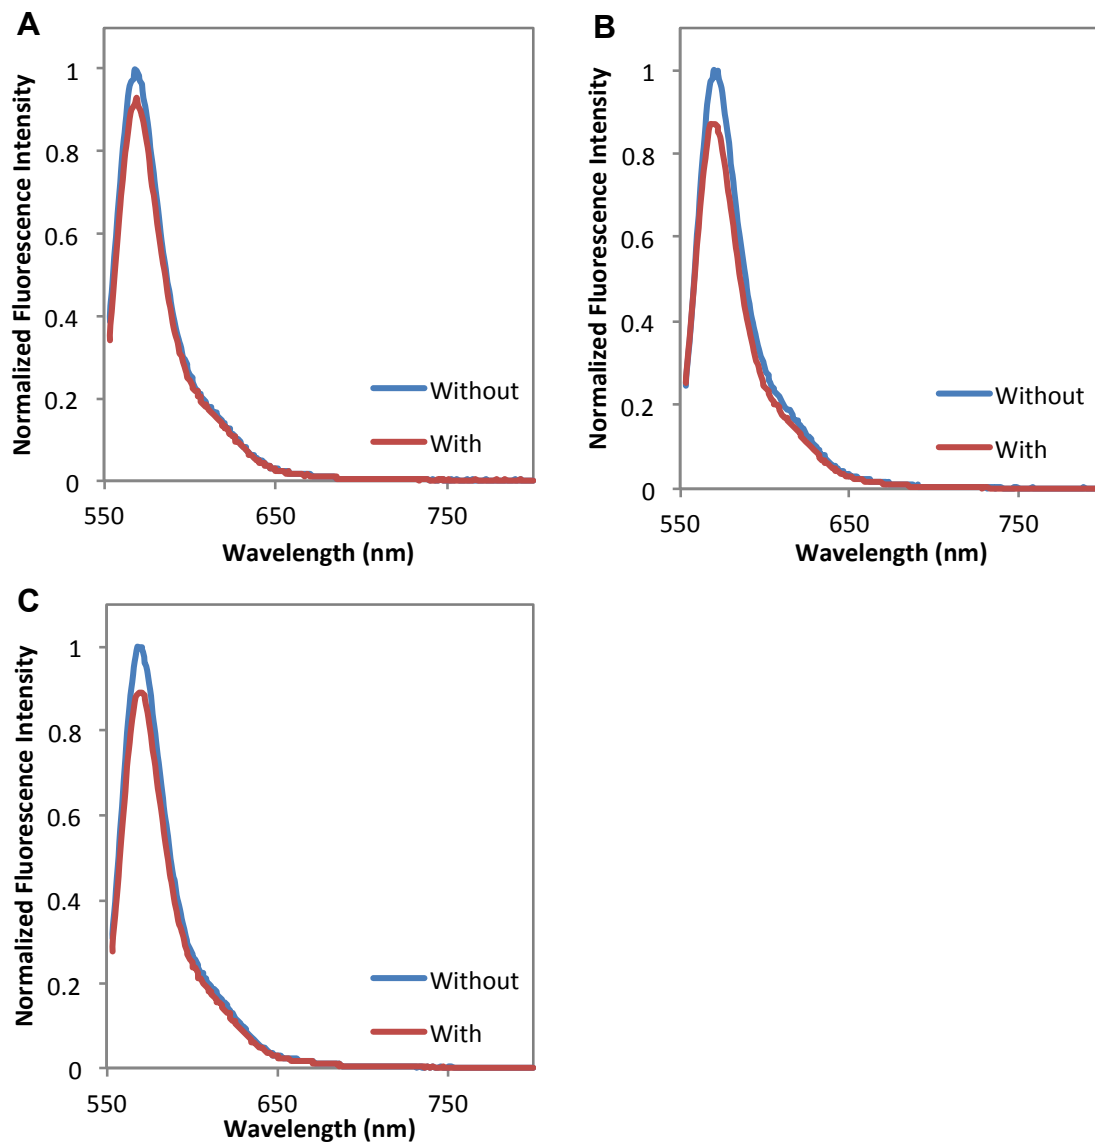

Figure S5: Normalized fluorescence intensity of parent dyes (A) [RhB][Cl], (B) [RhB][NTf<sub>2</sub>], and (C) [RhB][BETI] in the absence and presence of N719 (acceptor). Spectra for each dye were normalized by setting the highest intensity in the absence of N719 to a value of 1.

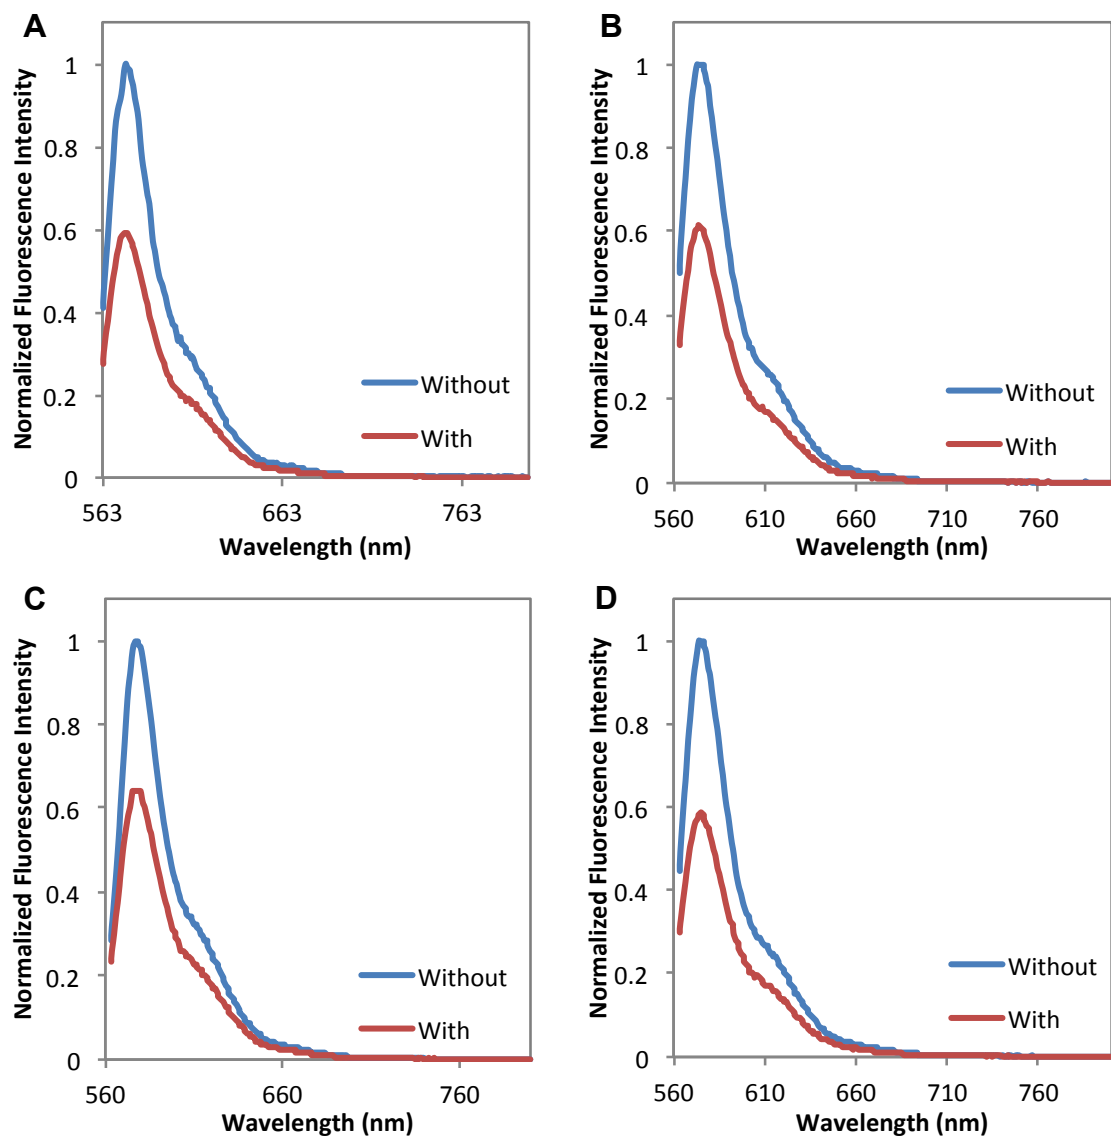

Figure S6: Normalized fluorescence intensity of parent dyes (A) [TC1][I], (B) [TC1][NTf<sub>2</sub>], (C) [TC1][BETI], and (D) [TC1][TPB] in the absence and presence of N719 (acceptor). Spectra for each dye were normalized by setting the highest intensity in the absence of N719 to a value of 1.

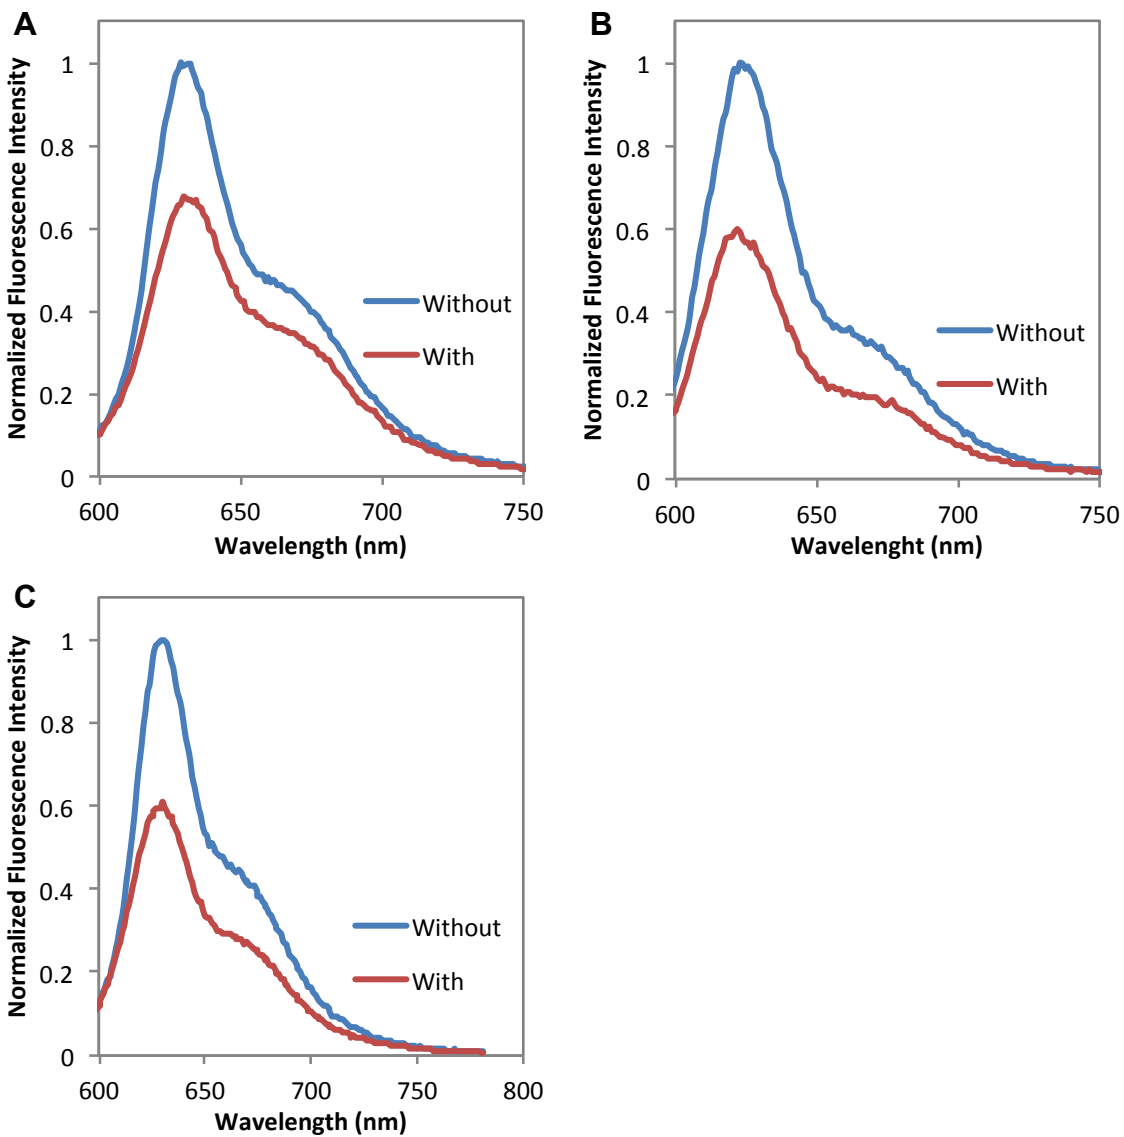

Figure S7: Normalized fluorescence intensity of parent dyes (A) [PC][I], (B) [PC][NTf<sub>2</sub>], and (C) [PC][BETI] in the absence and presence of N719 (acceptor). Spectra for each dye were normalized by setting the highest intensity in the absence of N719 to a value of 1.

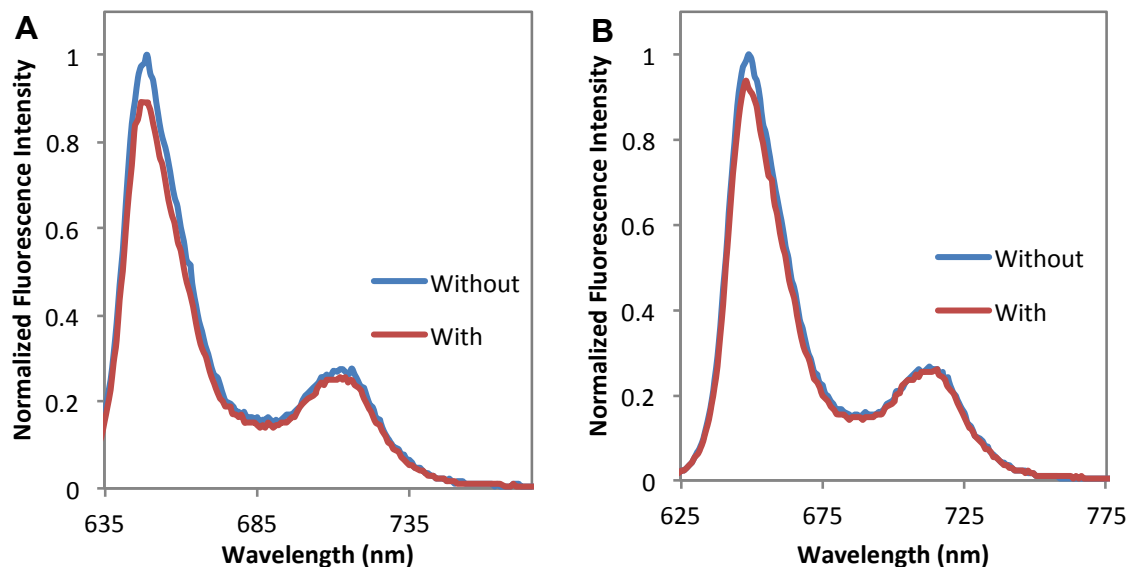

Figure S8: Normalized fluorescence intensity of parent dyes (A)  $[H]_4[TCPP]$  and (B)  $[P66614]_4[TCPP]$  in the absence and presence of N719 (acceptor). Spectra for each dye were normalized by setting the highest intensity in the absence of N719 to a value of 1.

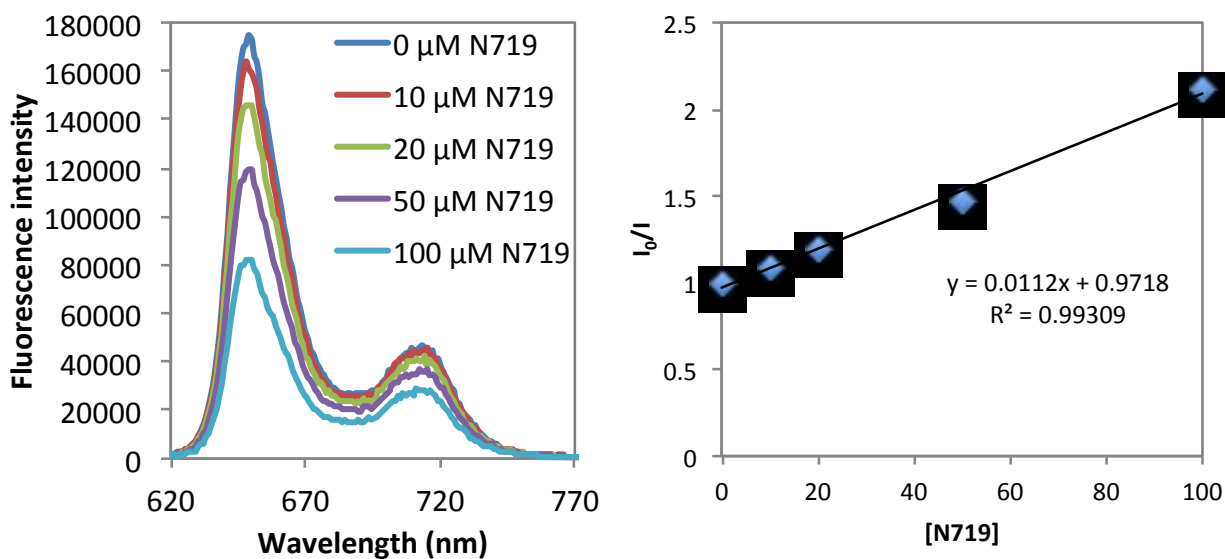

Figure S9: Fluorescence intensity (left) of  $[P66614]_4[TCPP]$  in the absence and presence of N719 (acceptor). Concentration of  $[P66614]_4[TCPP]$  was held at 10  $\mu$ M. Stern-Volmer plot (right) of  $[P66614]_4[TCPP]$  in the absence and presence of N719 (acceptor).  $I_0$ ,  $I$ , and [N719] represent the initial fluorescence intensity, fluorescence intensity, and concentration of N719.

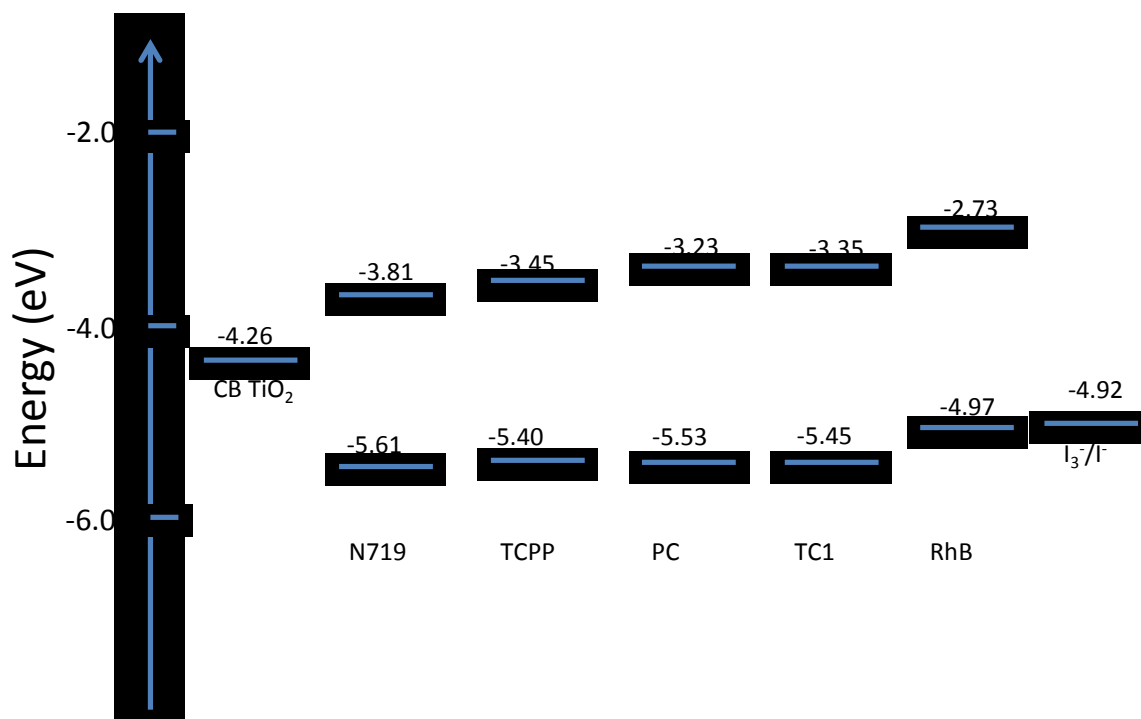

Figure S10: Energy levels of parent dyes, titanium dioxide, and I<sub>3</sub><sup>-</sup>/I<sup>-</sup>. The highest occupied molecular orbital (HOMO) and lowest unoccupied molecular orbital (LUMO) energy levels are acquired from electrochemical measurements and band gap was determined from absorption onset wavelength.

**Electrochemical data was taken from the following papers:**

P. E. Kolic, N. Siraj, S. Hamdan, B. P. Regmi and I. M. Warner, *J. Phys. Chem. C*, 2016, **120**, 5155-5163.

A. N. Jordan, S. Das, N. Siraj, S. L. de Rooy, M. Li, B. El-Zahab, L. Chandler, G. A. Baker and I. M. Warner, *Nanoscale*, 2012, **4**, 5031-5038.

Z. Zhang, Y. Yu and P. Wang, *ACS Applied Materials & Interfaces*, 2012, **4**, 990-996.

G. Pepe, J. M. Cole, P. G. Waddell and S. McKechnie, *Molecular Systems Design & Engineering*, 2016, **1**, 86-98.

M. M. Rahman, M. J. Ko and J.-J. Lee, *Nanoscale*, 2015, **7**, 3526-3531.
